# Supplementary material
Source: PubMed Central journal article supplement (PMC6806435)
Supplement: jamainternmed-180-45-s002.pdf [file jamainternmed-180-45-s002.pdf]

## Supplementary Online Content

Kronish IM, Moise N, Cheung YK, et al. Effect of depression screening after acute coronary syndromes on quality of life: the CODIACS-QoL randomized clinical trial. *JAMA Intern Med*. Published online October 21, 2019.

doi:10.1001/jamainternmed.2019.4518

**eTable 1.** Utility Scores and Depressive Symptoms from Baseline to 18 Months

**eTable 2.** Sex-Specific Analyses of Key Outcomes of CODIACS-QOL Trial

**eTable 3.** Patient-Reported Receipt of Mental Health Treatment Since the Prior Study Visit From 6 Months to 18 Months

This supplementary material has been provided by the authors to give readers additional information about their work.

**eTable 1.** Utility Scores and Depressive Symptoms from Baseline to 18 Months\*

| Outcome                                | Baseline               |                 |                |         | 6-Months               |                 |                |         | 12-Months              |                 |                |         | 18-Months              |                 |                |         |
|----------------------------------------|------------------------|-----------------|----------------|---------|------------------------|-----------------|----------------|---------|------------------------|-----------------|----------------|---------|------------------------|-----------------|----------------|---------|
|                                        | Screen, Notify & Treat | Screen & Notify | No Screen      | P Value | Screen, Notify & Treat | Screen & Notify | Control        | P Value | Screen, Notify & Treat | Screen & Notify | Control        | P Value | Screen, Notify & Treat | Screen & Notify | Control        | P Value |
| Utility Scores (calculated from SF-12) | 0.77<br>(0.15)         | 0.78<br>(0.14)  | 0.77<br>(0.15) | .70     | 0.74<br>(0.17)         | 0.74<br>(0.17)  | 0.73<br>(0.17) | .42     | 0.73<br>(0.20)         | 0.73<br>(0.20)  | 0.73<br>(0.19) | .92     | 0.71<br>(0.25)         | 0.71<br>(0.24)  | 0.72<br>(0.22) | .87     |
| Depressive Symptoms (CESD-10 score)    | 4.91<br>(5.16)         | 4.77<br>(4.85)  | 4.74<br>(4.56) | .85     | 6.23<br>(5.86)         | 6.12<br>(5.75)  | 6.01<br>(5.33) | .88     | 6.26<br>(5.74)         | 5.87<br>(5.52)  | 6.45<br>(5.77) | .29     | 5.30<br>(5.52)         | 5.33<br>(5.46)  | 5.64<br>(5.43) | .82     |
| Depressive Symptoms (PHQ-8 score)      | 2.94<br>(3.80)         | 2.73<br>(3.53)  | N/A            | .36     | NA                     | NA              | NA             | NA      | NA                     | NA              | NA             | NA      | 3.68<br>(4.50)         | 3.69<br>(4.28)  | 3.81<br>(4.31) | .99     |

\*Data are presented as mean (SD).

Abbreviations: SF-12, Short Form-12 Health Survey; SF-6D, Short-Form 6-Dimension; CESD-10, 10-item Center for Epidemiologic Studies Depression scale; PHQ-8, 8-item Patient Health Questionnaire; NA, not applicable as PHQ-8 not assessed at those time points in those groups

**eTable 2.** Sex-Specific Analyses of Key Outcomes of CODIACS-QOL Trial\*

| <b>Outcomes</b>                                                                    | <b>Screen, Notify &amp; Treat</b><br>(N=357 Men; N=141 Women) | <b>Screen &amp; Notify</b><br>(N=364 Men; N=137 Women) | <b>No Screen</b><br>(N=355 Men; N=143 Women) | <b>P Value</b> |
|------------------------------------------------------------------------------------|---------------------------------------------------------------|--------------------------------------------------------|----------------------------------------------|----------------|
| Change in QALYs, Women only                                                        | -0.07 (0.23)                                                  | -0.08 (0.20)                                           | -0.04 (0.17)                                 | .29            |
| Change in QALYs, Men only                                                          | -0.06 (0.18)                                                  | -0.05 (0.19)                                           | -0.06 (0.18)                                 | .95            |
| Omnibus F-test (gender*treatment arm)                                              | -                                                             | -                                                      | -                                            | .31            |
| Cumulative depression-free days, Women only                                        | 304.67 (182.39)                                               | 317.94 (176.06)                                        | 306.58 (182.33)                              | .81            |
| Cumulative depression-free days, Men only                                          | 356.25 (176.27)                                               | 363.50 (173.42)                                        | 349.83 (171.74)                              | .59            |
| Omnibus F-test (gender*treatment arm)                                              | -                                                             | -                                                      | -                                            | .96            |
| Change in Center for Epidemiologic Studies—Depression scale-10 score, Women only   | 0.58 (4.28)                                                   | 0.84 (3.36)                                            | 1.12 (3.48)                                  | .49            |
| Change in Change in Center for Epidemiologic Studies—Depression scale-10, Men only | 1.10 (3.40)                                                   | 0.94 (3.15)                                            | 1.15 (3.38)                                  | .68            |
| Omnibus F-test (gender*treatment arm)                                              | -                                                             | -                                                      | -                                            | .58            |
| Patient Health Questionnaire-8 score at 18-mo, Women only                          | 4.05 (4.54)                                                   | 4.61 (4.78)                                            | 4.45 (4.41)                                  | .82            |
| Patient Health Questionnaire-8 score at 18-mo, Men only                            | 3.53 (4.48)                                                   | 3.34 (4.03)                                            | 3.55 (4.26)                                  | .86            |
| Omnibus F-test (gender*treatment arm)                                              | -                                                             | -                                                      | -                                            | .73            |
| Change in Patient Health Questionnaire-8, Women only                               | 0.21 (5.17)                                                   | 1.15 (4.21)                                            | N/A                                          | .15            |
| Change in Patient Health Questionnaire-8, Men only                                 | 0.94 (3.80)                                                   | 0.89 (4.16)                                            | N/A                                          | .88            |
| Omnibus F-test (gender*treatment arm)                                              | -                                                             | -                                                      | -                                            | .18            |

\* Three patients reported their gender as unknown/transgender, and are not included in these analyses. Data are presented as mean (SD).

**eTable 3.** Patient-Reported Receipt of Mental Health Treatment Since the Prior Study Visit From 6 Months to 18 Months

| Outcome                        | 6 Months               |                 |           |         | 12 Months              |                 |           |         | 18 Months              |                 |           |         |
|--------------------------------|------------------------|-----------------|-----------|---------|------------------------|-----------------|-----------|---------|------------------------|-----------------|-----------|---------|
|                                | Screen, Notify & Treat | Screen & Notify | No Screen | P Value | Screen, Notify & Treat | Screen & Notify | No Screen | P Value | Screen, Notify & Treat | Screen & Notify | No Screen | P Value |
| Took medication for depression | 7 (1.6)                | 17 (3.9)        | 14 (3.1)  | .11     | 7 (1.7)                | 12 (2.8)        | 14 (3.3)  | .32     | 7 (1.8)                | 19 (4.7)        | 15 (3.7)  | .08     |
| Saw a mental health provider   | 44 (11.1)              | 28 (7.3)        | 38 (9.2)  | .18     | 37 (9.7)               | 24 (6.2)        | 30 (7.7)  | .19     | 26 (7.5)               | 23 (6.4)        | 35 (9.6)  | .26     |

Data are presented as N (%).
