# Supplementary material
Source: PubMed Central journal article supplement (PMC6806435)
Supplement: jamainternmed-180-45-s003.pdf [file jamainternmed-180-45-s003.pdf]

# Data Sharing Statement

Kronish. Effect of Depression Screening After Acute Coronary Syndromes on Quality of Life. *JAMA Intern Med*. Published October 21, 2019. 10.1001/jamainternmed.2019.4518

## Data

**Data available:** Yes

**Data types:** Deidentified participant data, Data dictionary

**How to access data:** Request data from Ian Kronish:

[ik2293@columbia.edu](mailto:ik2293@columbia.edu)

**When available:** With publication

## Supporting Documents

**Document types:** None

## Additional Information

**Who can access the data:** Researchers whose proposed use of the data has been approved.

**Types of analyses:** For a specified purpose to be determined by the requester.

**Mechanisms of data availability:** After approval of a proposal
